# Supplementary material
Source: PubMed Central journal article supplement (PMC2707189)

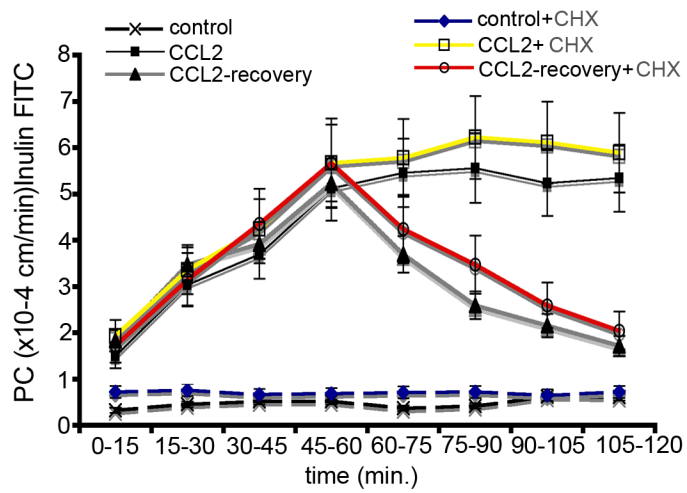

Supplemental figure 1.

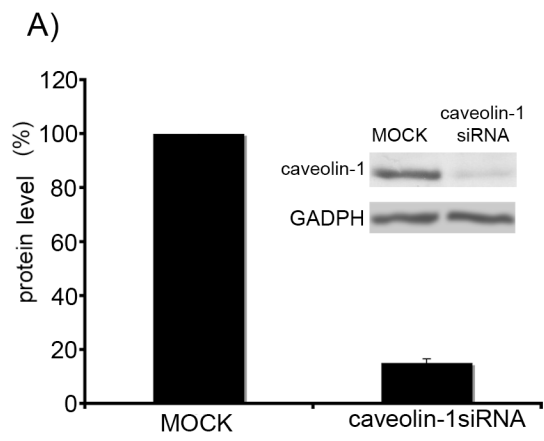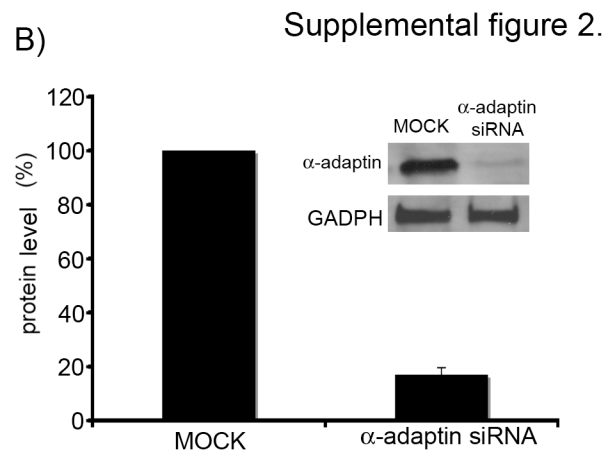

Supplement: supp_M109.000521_suppdata.pdf [file supp_M109.000521_suppdata.pdf]
